# Supplementary material for: Rapid real-time detection of procalcitonin using a microcontact imprinted surface plasmon resonance biosensor
Source: Royal Society of Chemistry journal article supplement (doi:10.1039/c3an00958k), 2013-01-01
Supplement: c3an00958k.pdf [file c3an00958k.pdf]

## **Supplementary Information**

### **Rapid real-time detection of procalcitonin using a microcontact imprinted surface plasmon resonance biosensor**

**Gulsu Sener<sup>1,2</sup>, Erdogan Ozgur<sup>1</sup>, Abbas Yousefi Rad<sup>3</sup>,**

**Lokman Uzun<sup>1</sup>, Ridvan Say<sup>4</sup>, Adil Denizli<sup>1</sup>**

<sup>1</sup>Hacettepe University, Faculty of Science, Department of Chemistry, Ankara

<sup>2</sup>Hacettepe University, Institute of Science, Nanotechnology and Nanomedicine Division, Ankara

<sup>3</sup>Koru Hospitals, Clinical Laboratories, Ankara

<sup>4</sup>Anadolu University, Faculty of Science, Department of Chemistry, Eskişehir

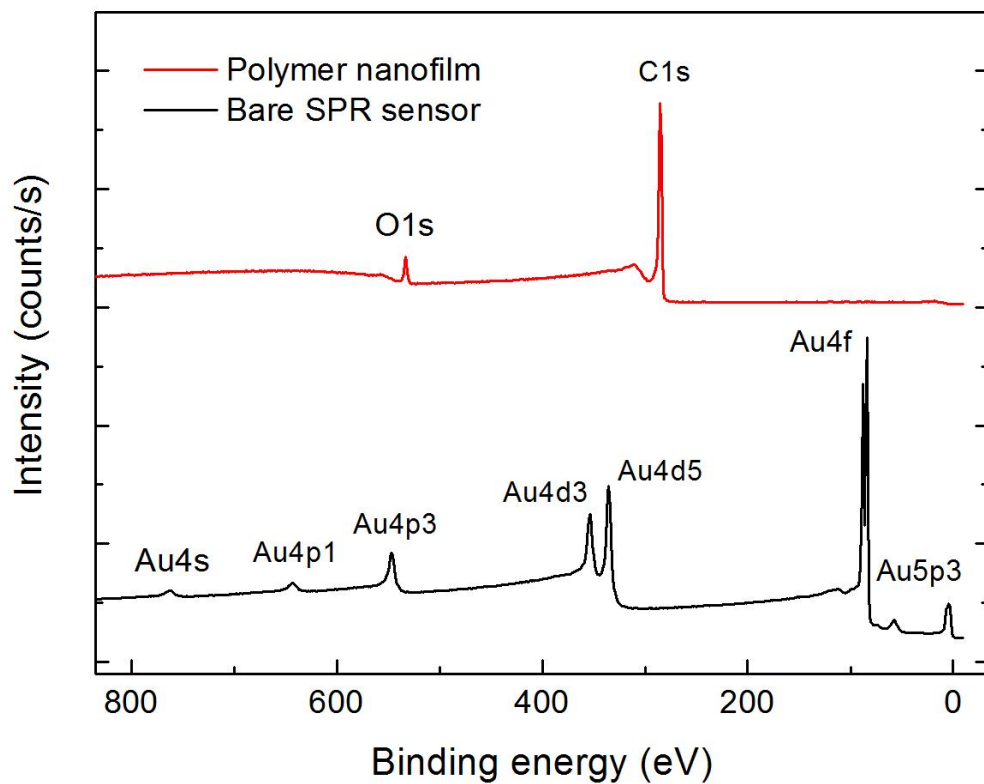

**Fig. S1.** XPS spectra of bare and polymer film coated SPR sensor surfaces.
